# Supplementary material
Source: PubMed Central journal article supplement (PMC6319264)
Supplement: NIHMS1512594-supplement-5.pdf [file NIHMS1512594-supplement-5.pdf]

**Supplementary Table 1. Primers and PCR conditions used for overlap extension PCR**

|                          | <b>Primer</b>                                   | <b>Sequence</b>                           | <b>PCR Conditions</b>                                                                                                                                   |
|--------------------------|-------------------------------------------------|-------------------------------------------|---------------------------------------------------------------------------------------------------------------------------------------------------------|
| 1 <sup>st</sup><br>round | <b><i>Patient LTR:</i></b><br>U3-F-LTR          | 5'-GAAGGGCTAATTCCTCCC-3'                  | 94°C for 2 minutes,<br>35 cycles of (94°C 15<br>for seconds, 48°C for<br>15 seconds and 72°C<br>for 1 min), final<br>extension at 72°C for<br>8 minutes |
|                          | nefLTR3'2Xbal                                   | 5'-CGTGCTCTAGAAAAGGGTCT<br>GAGGGATCTCT-3' |                                                                                                                                                         |
|                          | <b><i>NL4-3<br/>template:</i></b><br>nefLTR5'#3 | 5'-<br>ATAGCAGTAGCTGAGGGGACA-<br>3'       |                                                                                                                                                         |
|                          | U3-R-LTR                                        | 5'-GGGAGTGAATTAGCCCTTC-3'                 |                                                                                                                                                         |

|                          |               |                                           |                                                                                                                                                            |
|--------------------------|---------------|-------------------------------------------|------------------------------------------------------------------------------------------------------------------------------------------------------------|
| 2 <sup>nd</sup><br>round | N/A           | N/A                                       | 94°C for 10 minutes,<br>10 cycles of (94°C for<br>10 seconds, 48°C for<br>15 seconds, 72°C for<br>20 seconds), final<br>extension at 72°C for<br>7 minutes |
| 3 <sup>rd</sup><br>round | nefLTR5'#3    | 5'-<br>ATAGCAGTAGCTGAGGGGACA-<br>3'       | 94°C for 2 minutes,<br>35 cycles of (94°C 15<br>seconds, 48°C for 15<br>seconds and 72°C<br>for 1 min), final<br>extension at 72°C for<br>8 minutes        |
|                          | nefLTR3'2Xbal | 5'-CGTGCTCTAGAAAAGGGTCT<br>GAGGGATCTCT-3' |                                                                                                                                                            |
