# Supplementary material
Source: PubMed Central journal article supplement (PMC6319264)
Supplement: NIHMS1512594-supplement-Figure_S3.pdf [file NIHMS1512594-supplement-Figure_S3.pdf]

A

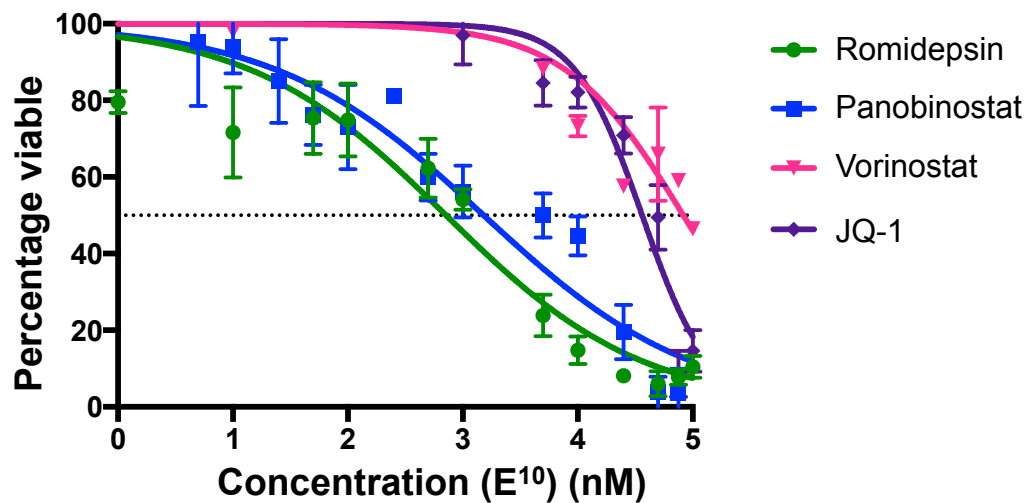

B

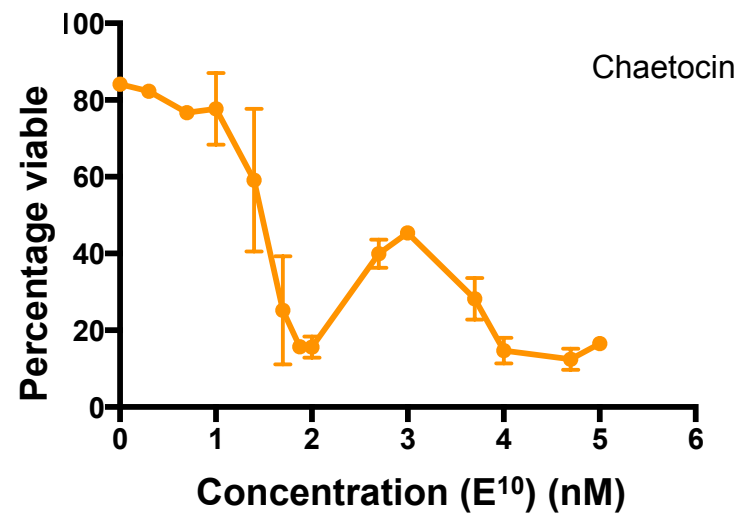

|                                  | Romidepsin              | Panobinostat | Vorinostat | JQ-1                      | Chaetocin                           |
|----------------------------------|-------------------------|--------------|------------|---------------------------|-------------------------------------|
| <b>Functions</b>                 | Class I selective HDACi | Pan-HDACi    | Pan-HDACi  | BET Bromodomain Inhibitor | Histone Methyltransferase Inhibitor |
| <b><math>CC_{50}</math> (nM)</b> | 715                     | 1519         | 82906      | 36330                     | NA                                  |
| <b>Used (nM)</b>                 | 40                      | 50           | 500        | 1000                      | 10                                  |
