# Supplementary material
Source: PubMed Central journal article supplement (PMC6319264)

**A**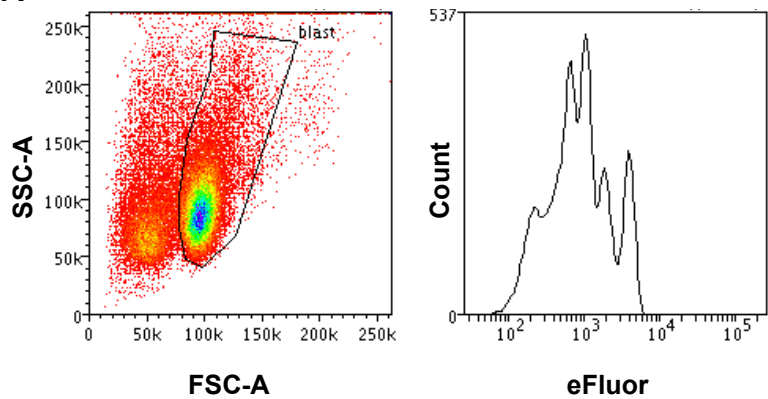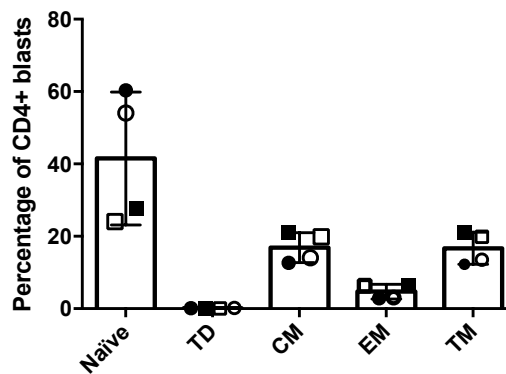**B**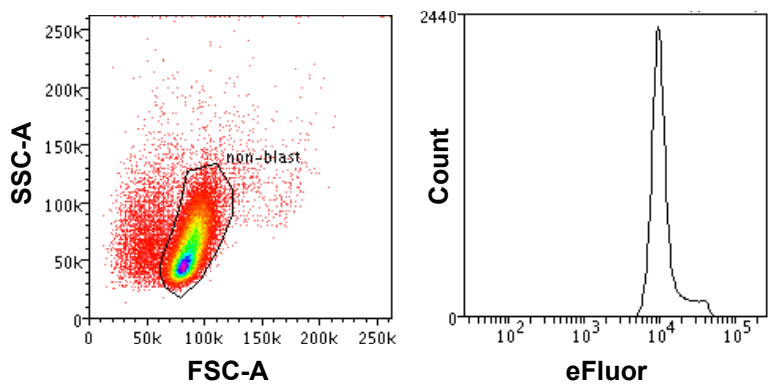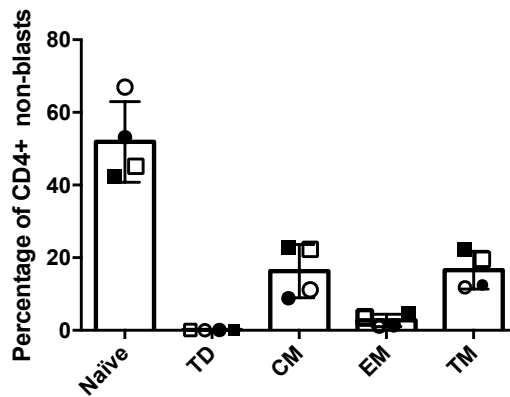

Supplement: NIHMS1512594-supplement-Figure_S1.pdf [file NIHMS1512594-supplement-Figure_S1.pdf]

**Blasts**

**DMSO**

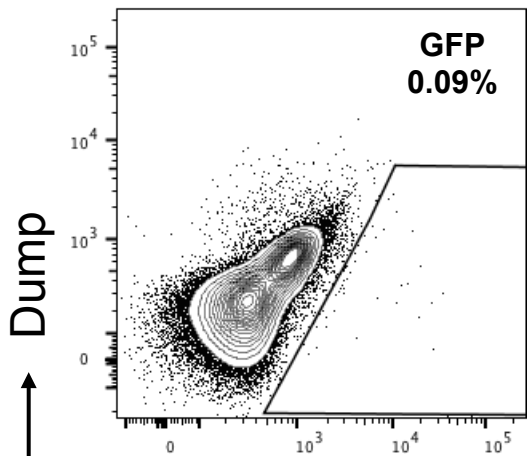

**RMD**

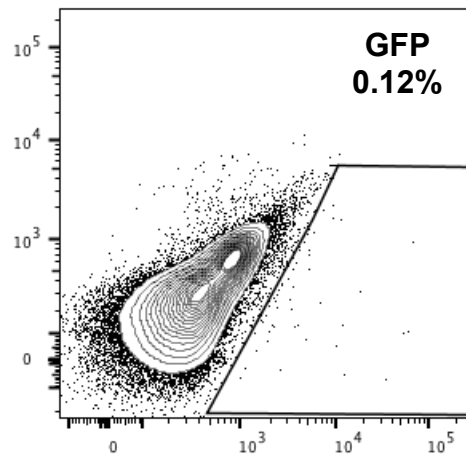

**PMA/PHA**

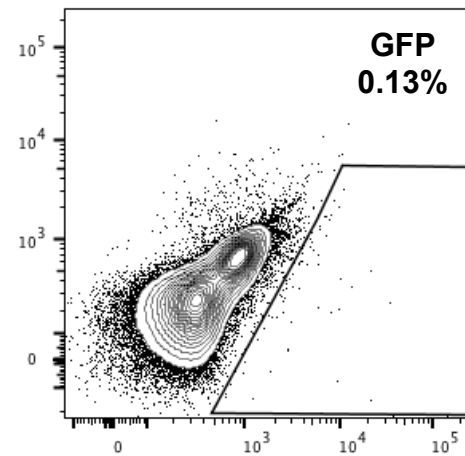

**Non-Blasts**

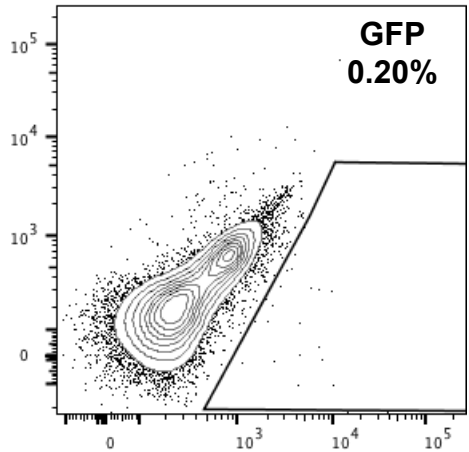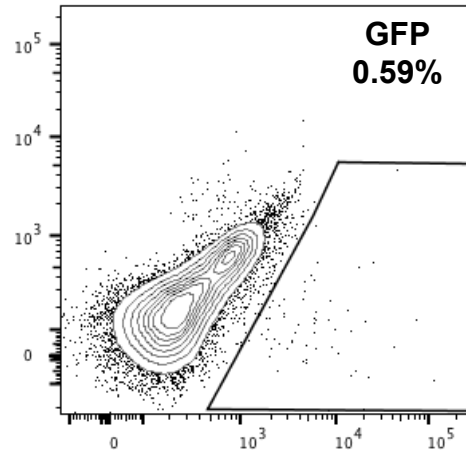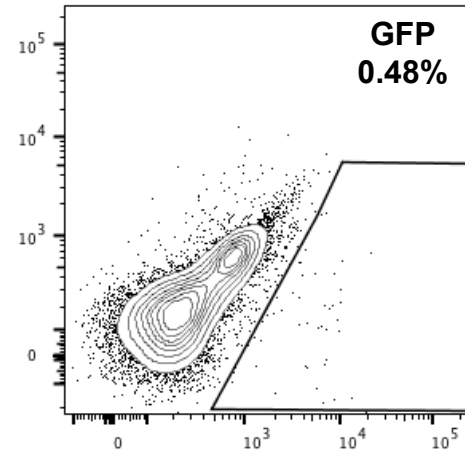

**GFP**

Supplement: NIHMS1512594-supplement-Figure_S2.pdf [file NIHMS1512594-supplement-Figure_S2.pdf]

Romidepsin

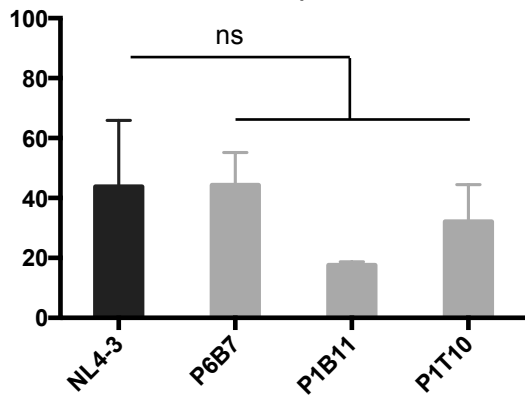

Panobinostat

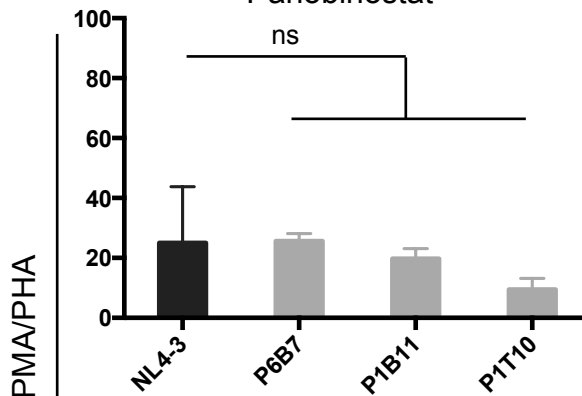

Vorinostat

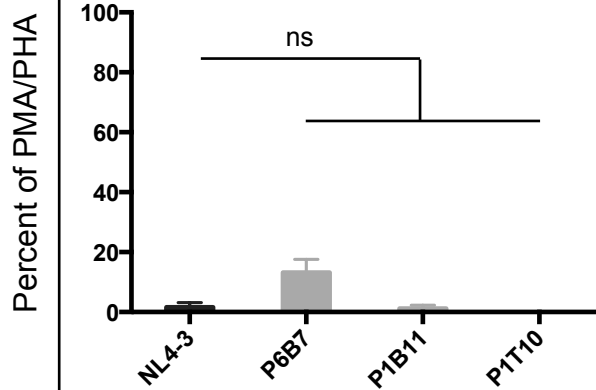

JQ-1

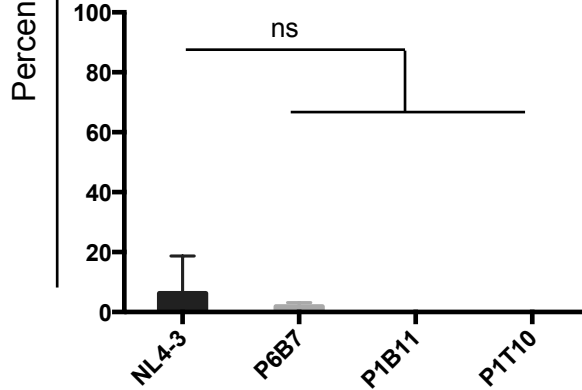

Chaetocin

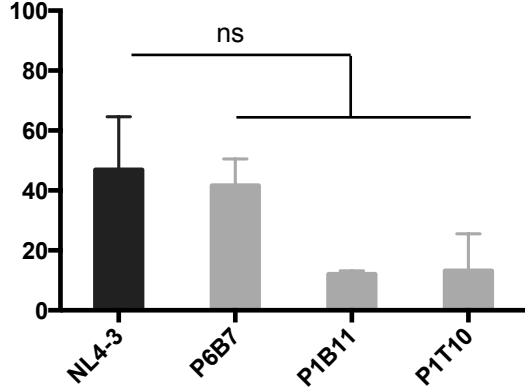

Supplement: NIHMS1512594-supplement-Figure_S4.pdf [file NIHMS1512594-supplement-Figure_S4.pdf]
